# Supplementary material for: Upregulation of Anti-Angiogenic miR-106b-3p Correlates Negatively with IGF-1 and Vascular Health Parameters in a Model of Subclinical Cardiovascular Disease: Study with Metformin Therapy
Source: MDPI journal article supplement (doi:10.3390/biomedicines12010171), 2024-01-12
Supplement: s1 [file s1]

## Supplementary Material

# Upregulation of Anti-Angiogenic miR-106b-3p Correlates Negatively with IGF-1 and Vascular Health Parameters in a Model of Subclinical Cardiovascular Disease: Study with Metformin Therapy

Sherin Bakhshab<sup>1,2,3</sup>, Josie O'Neill<sup>2,4</sup>, Rosie Barber<sup>2,4</sup>, Catherine Arden<sup>4</sup> and Jolanta U. Weaver<sup>2,5,6,\*</sup>

<sup>1</sup> Biochemistry Department, King Abdulaziz University, P.O. Box 80218, Jeddah 21589, Saudi Arabia; sbakhshab@kau.edu.sa (S.B.)

<sup>2</sup> Translational and Clinical Research Institute, Newcastle University, Newcastle upon Tyne NE2 4HH, UK; josieoneill@virginmedia.com (J.O.); rosie\_barber@icloud.com (R.B.); Jolanta.Weaver@newcastle.ac.uk (J.U.W)

<sup>3</sup> Center of Excellence in Genomic Medicine Research, King Abdulaziz University, Jeddah 2189, Saudi Arabia

<sup>4</sup> Biosciences Institute, Newcastle University, Newcastle upon Tyne NE2 4HH, UK; catherine.arden@newcastle.ac.uk (C.A.)

<sup>5</sup> Department of Diabetes, Queen Elizabeth Hospital, Gateshead, Newcastle Upon Tyne NE9 6SH, UK

<sup>6</sup> Vascular Biology and Medicine Theme, Newcastle University, Newcastle upon Tyne NE1 7RU, UK

\* Correspondence: Jolanta.Weaver@newcastle.ac.uk; Tel.: +44-191-445-2181

**Table S1.** The predicted consequential pairing of miR-106b-3p and transcript target regions.

| Target gene | Representative transcript | Gene name                                                               | Transcript position | Predicted consequential pairing of target region. Transcript (top) and miRNA (bottom)                   | Site type   |
|-------------|---------------------------|-------------------------------------------------------------------------|---------------------|---------------------------------------------------------------------------------------------------------|-------------|
| ADAMTS13    | ENST00000371916.1         | A disintegrin and metalloprotease with thrombospondin type 1 repeats 13 | 213-219 3' UTR      | (transcript)<br>5' <b>GAGU</b> UCAUGUCGCAACAGUGC <b>GC</b><br>(miRNA)<br>3'CGUCGUUCAUGGGUGUCACGCC       | 7mer<br>-m8 |
| ADAMTS13    | ENST00000371916.1         | A disintegrin and metalloprotease with thrombospondin type 1 repeats 13 | 1165-1171 3' UTR    | (transcript)<br>5'GCCUGCGGGAGCGGCCAGUGCG <b>C</b><br>(miRNA)<br>3'CGUCGUUCAUGGGUGUCACGCC                | 7mer<br>-m8 |
| ADAMTS13    | ENST00000371916.1         | A disintegrin and metalloprotease with thrombospondin type 1 repeats 13 | 2576-2582 3' UTR    | (transcript)<br>5'GAGUUCUCUCAACUGCAGUGC <b>GG</b><br>(miRNA)<br>3'CGUCGUUCAUGGGUGUCACGCC                | 7mer<br>-m8 |
| GDNF        | ENST00000326524.2         | Glial cell derived neurotrophic factor                                  | 2049-2055 3' UTR    | (transcript)<br>5'CUC <b>CAGCC</b> UAAGUGA---<br><b>CAGUGCGG</b><br>(miRNA)<br>3'CGUCGUUCAUGGGUGUCACGCC | 7mer<br>-m8 |
| GDNF        | ENST00000326524.2         | Glial cell derived neurotrophic factor                                  | 2601-2608 3' UTR    | (transcript)<br>5'UUCAGAGAACCUUGGCAGUGC <b>GA</b><br>(miRNA)<br>3'CGUCGUUCAUGGGUGUCACGCC                | 8mer        |
| PDGFA       | ENST00000402802.3         | Platelet derived growth factor subunit A                                | 753-760 3' UTR      | (transcript)<br>5'CUGUAACUGUCAGGACAGUGC <b>GA</b><br>(miRNA)<br>3'CGUCGUUCAUGGGUGUCACGCC                | 8mer        |
| PDGFA       | ENST00000354513.5         | Platelet derived growth factor subunit A                                | 777-784 3' UTR      | (transcript)<br>5'CUGUAACUGUCAGGACAGUGC <b>GA</b><br>(miRNA)<br>3'CGUCGUUCAUGGGUGUCACGCC                | 8mer        |
| PIK3CG      | ENST00000359195.3         | Phosphatidylinositol-3-kinase catalytic subunit gamma                   | 25-31 3' UTR        | (transcript)<br>5'CUAGAAUCAAAAACAAGUUAG <b>UG</b><br>(miRNA)<br>3'AGUGAACUUAGACG----<br><b>UCAAUCAU</b> | 7mer<br>-m8 |
| PIK3CG      | ENST00000359195.3         | Phosphatidylinositol-3-kinase catalytic subunit gamma                   | 520-526 3' UTR      | (transcript)<br>5'AAAGCAAGGAAAGCG-<br><b>AGUUAGUC</b><br>(miRNA)<br>3'AGUGAACUUAGACGUCAAUCA <b>U</b>    | 7mer<br>-m8 |

Predictions of interaction sites between miR-106b-3p and the transcripts used the TargetScanHuman 8.0 ([https://www.targetscan.org/vert\\_80/](https://www.targetscan.org/vert_80/) accessed on 16 June 2023) and Diana-TarBase v8 (<https://dianalab.e-ce.uth.gr/html/diana/web/index.php?r=tarbasev8> accessed on 16 June 2023) databases. Predicted consequential pairing of miR-106b-3p and transcript target region are indicated by the nucleotides in bold.
